# Supplementary material for: Prediction of miRNA-disease associations using a dual-channel contrastive model based on multi-source information fusion
Source: PeerJ journal article supplement (doi:10.7717/peerj-cs.3378), 2025-12-01
Supplement: Supplemental_Article_S1.docx [file Supplemental_Article_S1.docx]

**Article S1**


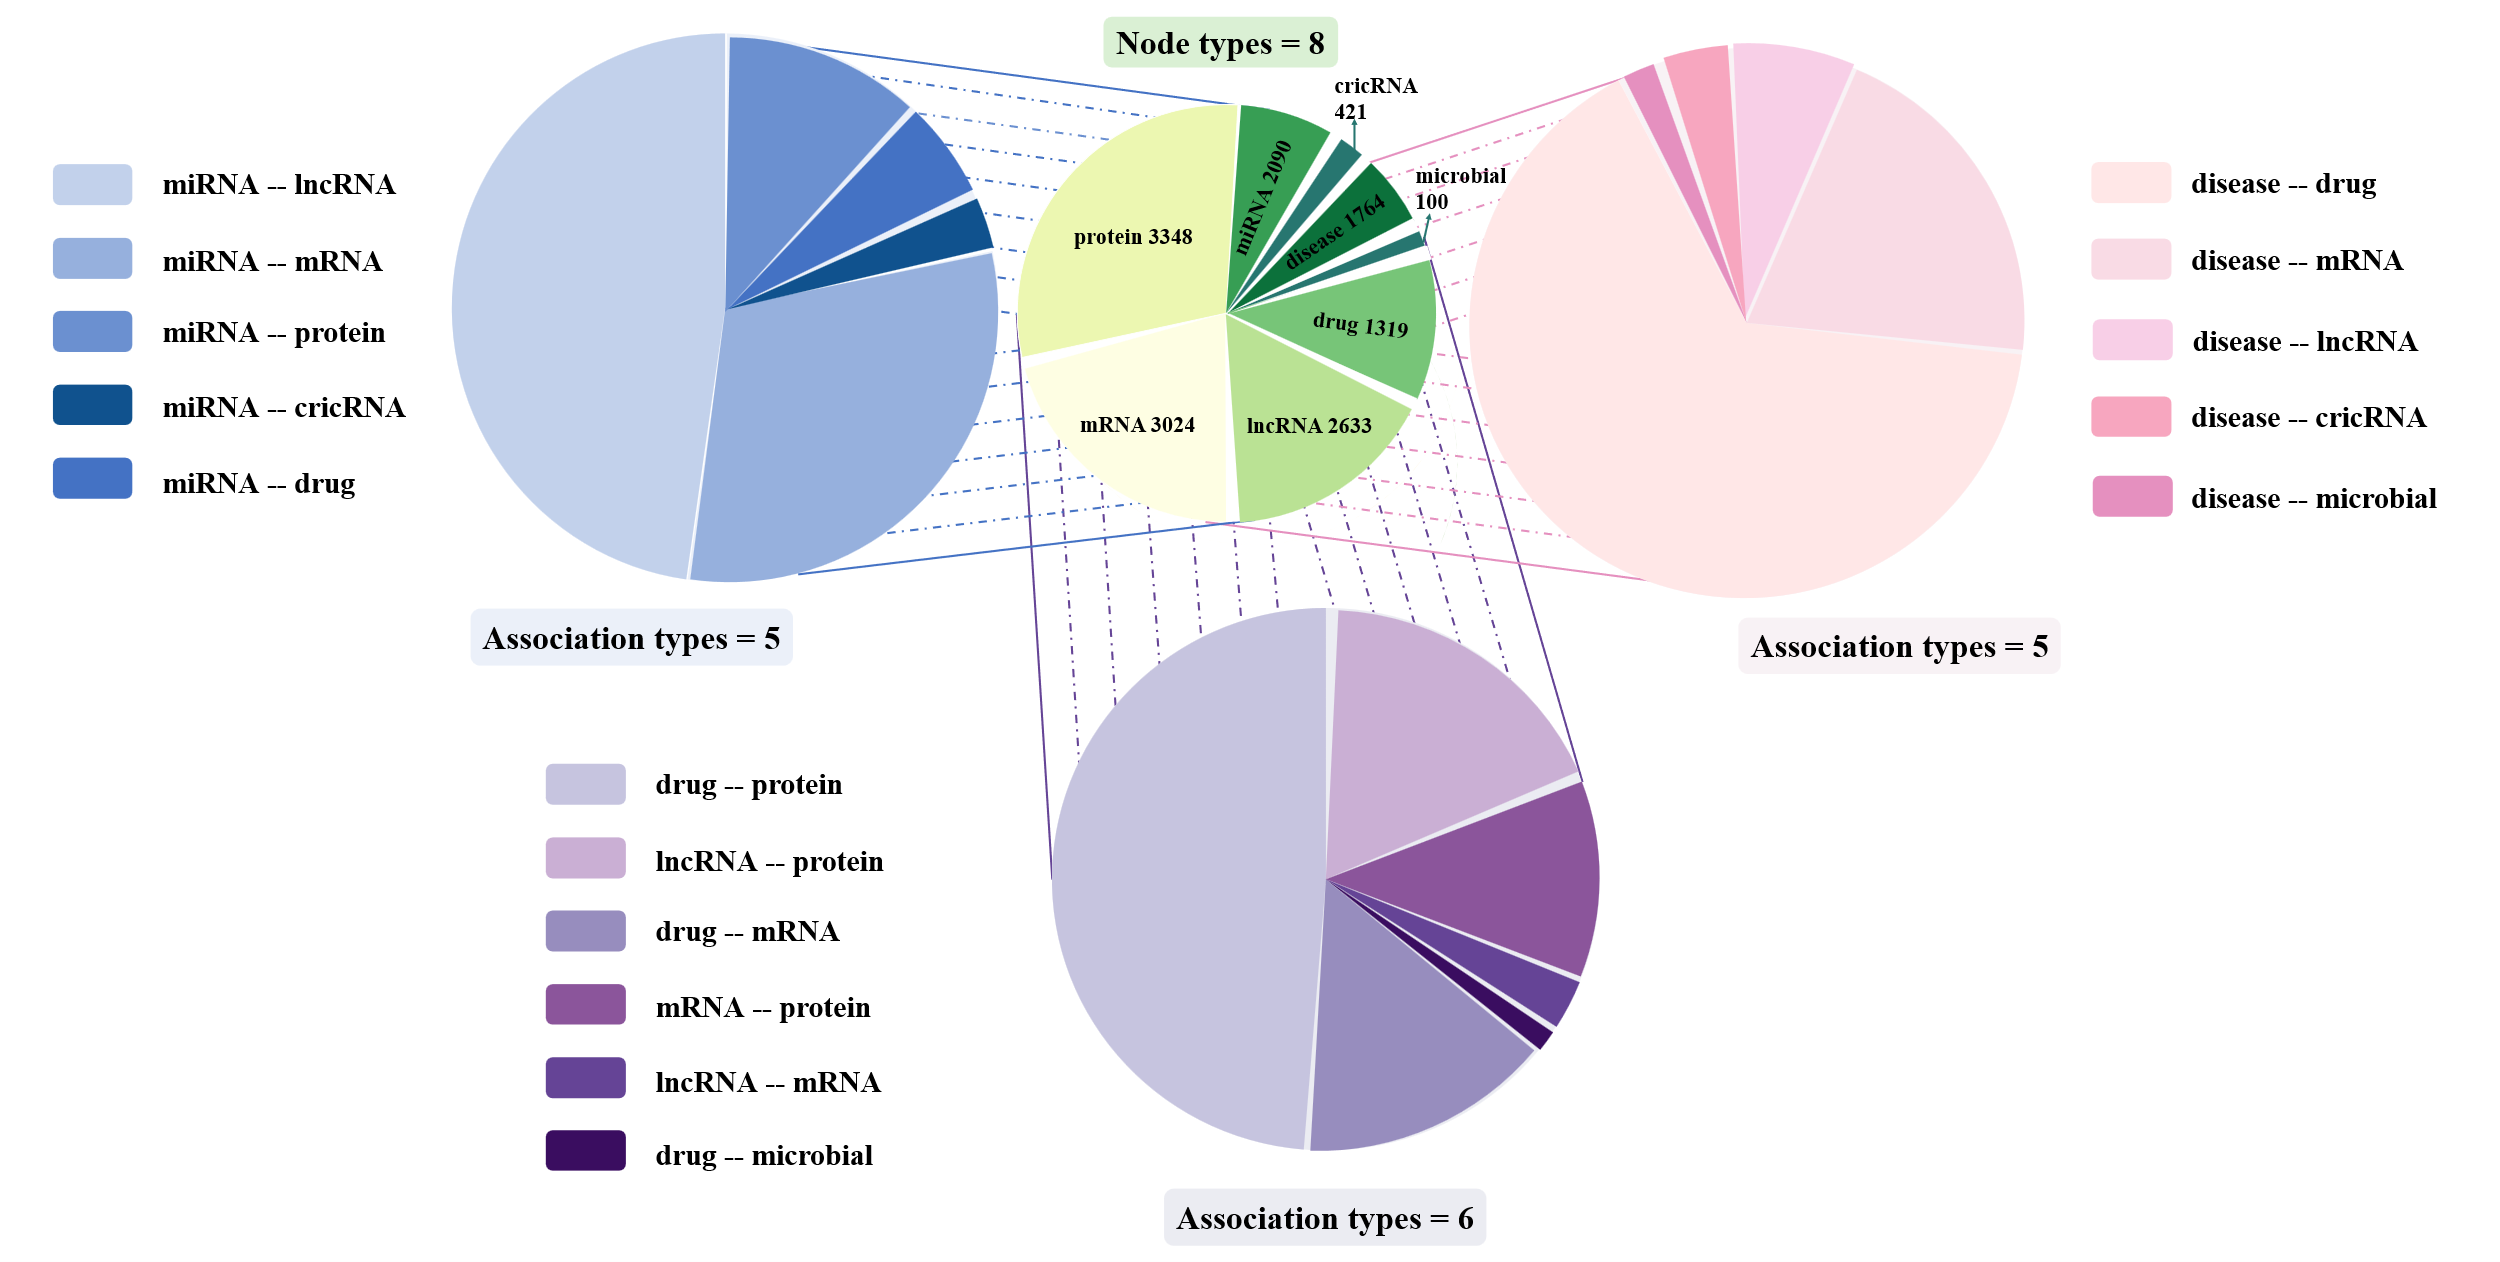


**Figure 1 Node and edge types included in the constructed heterogeneous graph** **features.**

**Tabel 1. The details of 16 types of associations used in heterogeneous graph features.**

| **Association types** | **number** |
| --- | --- |
| miRNA-lncRNA | 8634 |
| miRNA-mRNA | 5186 |
| miRNA-protein | 2042 |
| miRNA-circRNA | 1378 |
| miRNA-drug | 269 |
| disease-drug | 17414 |
| disease-mRNA | 3416 |
| disease-lncRNA | 874 |
| disease-circRNA | 421 |
| disease-microbe | 175 |
| drug-protein | 11396 |
| lncRNA-protein | 5115 |
| drug-mRNA | 3915 |
| mRNA-protein | 3012 |
| lncRNA-mRNA | 525 |
| drug-microbe | 8 |

The 16 associations consisting of 8 types of nodes are detailed in Figure 1 and Table 1.
