# Supplementary material for: Prediction of miRNA-disease associations using a dual-channel contrastive model based on multi-source information fusion
Source: PeerJ journal article supplement (doi:10.7717/peerj-cs.3378), 2025-12-01
Supplement: Supplemental_Article_S4.docx [file Supplemental_Article_S4.docx]

**Article S4**

To further validate the effectiveness of the proposed model, we conduct a systematic comparison between DCCM-MSIF and five representative state-of-the-art models published during 2023-2024. As shown in the table, DCCM-MSIF achieves the best overall performance on both the HMDD v3.2 and HMDD v2.0 datasets, exhibiting consistently strong results across all evaluation metrics.

Figure 1 The result of performance comparison among different methods


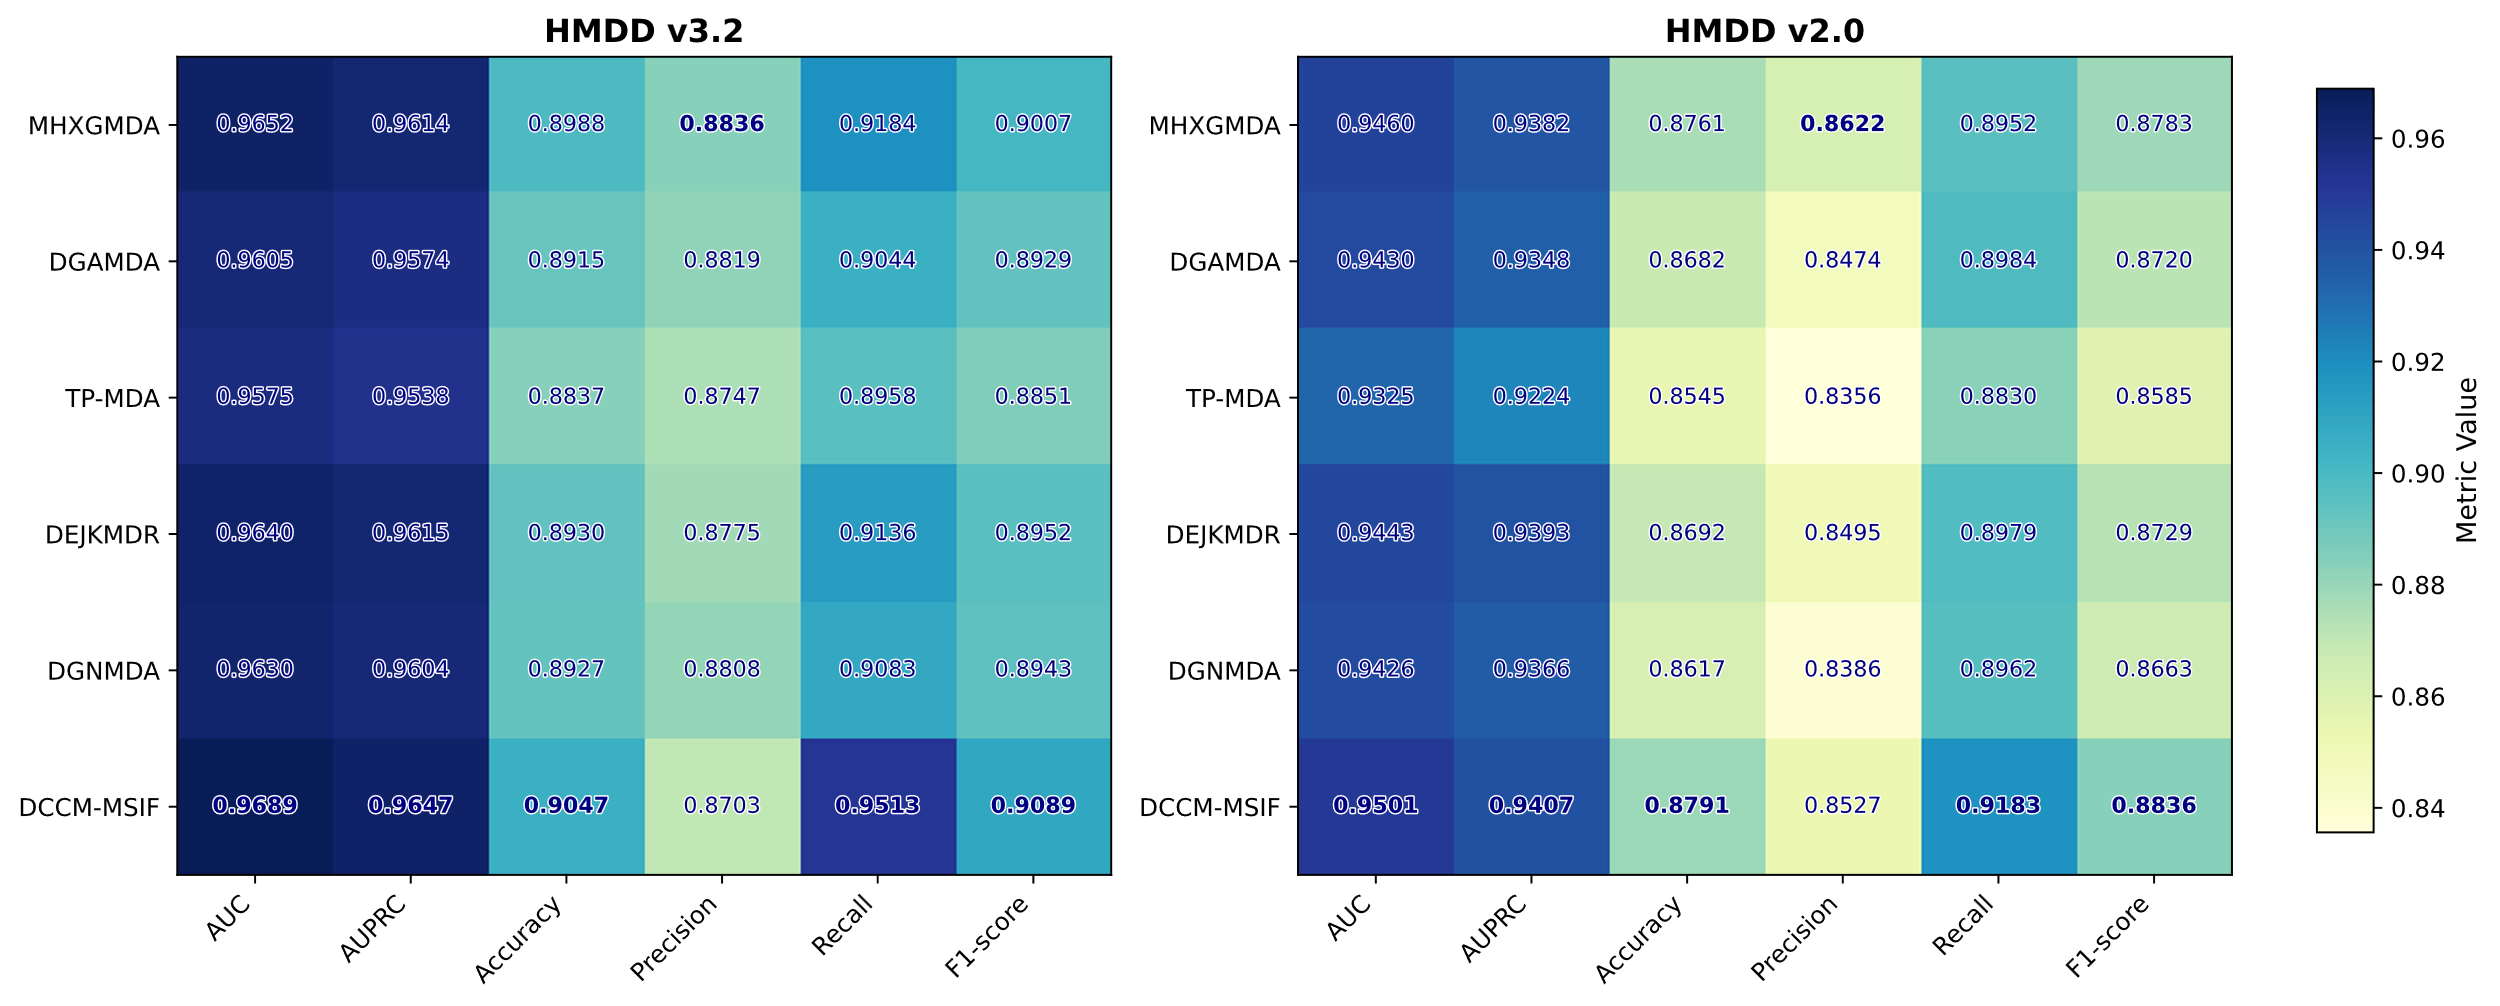


Table 1. The results of different methods on the HMDD v3.2 dataset.

| Methods | AUC | | AUPRC | | Accuracy | | Precision | | Recall | | F1-score | |
| --- | --- | --- | --- | --- | --- | --- | --- | --- | --- | --- | --- | --- |
| MHXGMDA (Wen et al., 2024) | | 0.9652 | | 0.9614 | | 0.8988 | | **0.8836** | | 0.9184 | | 0.9007 | |
| DGAMDA (Jia et al., 2024) | | 0.9605 | | 0.9574 | | 0.8915 | | 0.8819 | | 0.9044 | | 0.8929 | |
| TP-MDA (Hou et al., 2024) | | 0.9575 | | 0.9538 | | 0.8837 | | 0.8747 | | 0.8958 | | 0.8851 | |
| DEJKMDR (Gao et al., 2023) | | 0.9640 | | 0.9615 | | 0.8930 | | 0.8775 | | 0.9136 | | 0.8952 | |
| DGNMDA (Lu et al., 2024) | | 0.9630 | | 0.9604 | | 0.8927 | | 0.8808 | | 0.9083 | | 0.8943 | |
| DCCM-MSIF | | **0.9689** | | **0.9647** | | **0.9047** | | 0.8703 | | **0.9513** | | **0.9089** | |

Table 2. The results of different methods on the HMDD v2.0 dataset.

| Methods | AUC | | AUPRC | | Accuracy | | Precision | | Recall | | F1-score | |
| --- | --- | --- | --- | --- | --- | --- | --- | --- | --- | --- | --- | --- |
| MHXGMDA (Wen et al., 2024) | | 0.9460 | | 0.9382 | | 0.8761 | | **0.8622** | | 0.8952 | | 0.8783 | |
| DGAMDA (Jia et al., 2024) | | 0.9430 | | 0.9348 | | 0.8682 | | 0.8474 | | 0.8984 | | 0.8720 | |
| TP-MDA (Hou et al., 2024) | | 0.9325 | | 0.9224 | | 0.8545 | | 0.8356 | | 0.8830 | | 0.8585 | |
| DEJKMDR (Gao et al., 2023) | | 0.9443 | | 0.9393 | | 0.8692 | | 0.8495 | | 0.8979 | | 0.8729 | |
| DGNMDA (Lu et al., 2024) | | 0.9426 | | 0.9366 | | 0.8617 | | 0.8386 | | 0.8962 | | 0.8663 | |
| DCCM-MSIF | | **0.9501** | | **0.9407** | | **0.8791** | | 0.8527 | | **0.9183** | | **0.8836** | |

On the HMDD v3.2 dataset, DCCM-MSIF attains an AUC of 0.9689 and an AUPRC of 0.9647, both representing the highest values among all methods. Compared with the second-best model MHXGMDA (AUC = 0.9652, AUPRC = 0.9614), our approach still shows a noticeable improvement. Moreover, its recall (0.9513) and F1-score (0.9089) are substantially higher than those of other competitors, indicating stronger sensitivity and a better overall balance in identifying potential associations.

On the HMDD v2.0 dataset, DCCM-MSIF achieves an AUC of 0.9501 and an AUPRC of 0.9407, again outperforming all comparison methods. In particular, it improves upon DEJKMDR (AUC = 0.9443, AUPRC = 0.9393) by approximately 0.5-0.6%. The consistent superiority of DCCM-MSIF across both the earlier and updated versions of the database demonstrates its strong generalization ability and robustness under varying data scales and sparsity levels.

Overall, DCCM-MSIF achieves comprehensive superiority over all five representative models in this comparative analysis.

**References**

Gao SY, Kuang ZF, Duan T, and Deng L. 2023. DEJKMDR: miRNA-disease association prediction method based on graph convolutional network. *Frontiers in Medicine* 10:12 DOI: 10.3389/fmed.2023.1234050.

Hou BY, Li MS, Hou YX, Zeng M, Wang N, and Guan LX. 2024. A miRNA-disease association prediction model based on tree-path global feature extraction and fully connected artificial neural network with multi-head self-attention mechanism. *Bmc Cancer* 24:18 DOI: 10.1186/s12885-024-12420-5.

Jia CX, Wang FY, Xing BX, Li SN, Zhao Y, Li Y, and Wang Q. 2024. DGAMDA: Predicting miRNA-disease association based on dynamic graph attention network. *International Journal for Numerical Methods in Biomedical Engineering* 40:15 DOI: 10.1002/cnm.3809.

Lu DY, Zhang Q, Zheng CH, Li J, and Yin Z. 2024. DGNMDA: Dual Heterogeneous Graph Neural Network Encoder for miRNA-Disease Association Prediction. *Bioengineering-Basel* 11:18 DOI: 10.3390/bioengineering11111132.

Wen SJ, Liu YB, Yang G, Chen WX, Wu HT, Zhu XL, and Wang YM. 2024. A method for miRNA-disease association prediction using machine learning decoding of multi-layer heterogeneous graph Transformer encoded representations. *Scientific Reports* 14:1 DOI: 10.1038/s41598-024-76003-x.
