# Supplementary material for: Prediction of miRNA-disease associations using a dual-channel contrastive model based on multi-source information fusion
Source: PeerJ journal article supplement (doi:10.7717/peerj-cs.3378), 2025-12-01
Supplement: Supplemental_Table_S1.docx [file Supplemental_Table_S1.docx]

**Table S1.**

Performance of DCCM-MSIF across 5-fold cross-validation on the HMDD v3.2 dataset.

| Fold | AUC | AUPRC | Accuracy | Precision | Recall | F1-score |
| --- | --- | --- | --- | --- | --- | --- |
| 1st | 0.9701 | 0.9684 | 0.9088 | 0.8886 | 0.9413 | 0.9142 |
| 2nd | 0.9668 | 0.9636 | 0.8973 | 0.8668 | 0.9401 | 0.9019 |
| 3rd | 0.9701 | 0.9654 | 0.9096 | 0.8711 | 0.9590 | 0.9129 |
| 4th | 0.9672 | 0.9599 | 0.9030 | 0.8607 | 0.9570 | 0.9063 |
| 5th | 0.9704 | 0.9665 | 0.9047 | 0.8642 | 0.9589 | 0.9091 |
| Average | 0.9689 | 0.9647 | 0.9047 | 0.8703 | 0.9513 | 0.9089 |
