# Supplementary material for: Prediction of miRNA-disease associations using a dual-channel contrastive model based on multi-source information fusion
Source: PeerJ journal article supplement (doi:10.7717/peerj-cs.3378), 2025-12-01
Supplement: Supplemental_Table_S2.docx [file Supplemental_Table_S2.docx]

**Table S2.**

Performance of DCCM-MSIF across 5-fold cross-validation on the HMDD v2.0 dataset.

| Fold | AUC | AUPRC | Accuracy | Precision | Recall | F1-score |
| --- | --- | --- | --- | --- | --- | --- |
| 1st | 0.9519 | 0.9450 | 0.8821 | 0.8450 | 0.9401 | 0.8900 |
| 2nd | 0.9514 | 0.9424 | 0.8808 | 0.8745 | 0.8883 | 0.8814 |
| 3rd | 0.9530 | 0.9482 | 0.8821 | 0.8852 | 0.8804 | 0.8828 |
| 4th | 0.9455 | 0.9284 | 0.8757 | 0.8255 | 0.9419 | 0.8799 |
| 5th | 0.9485 | 0.9390 | 0.8748 | 0.8333 | 0.9409 | 0.8839 |
| Average | 0.9501 | 0.9406 | 0.8791 | 0.8527 | 0.9183 | 0.8836 |
