# Supplementary material for: Prediction of miRNA-disease associations using a dual-channel contrastive model based on multi-source information fusion
Source: PeerJ journal article supplement (doi:10.7717/peerj-cs.3378), 2025-12-01
Supplement: Supplemental_Table_S3.docx [file Supplemental_Table_S3.docx]

**Table S3.**

The results of different methods on the HMDD v3.2 dataset.

| Methods | AUC | | AUPRC | | Accuracy | | Precision | | Recall | | F1-score | |
| --- | --- | --- | --- | --- | --- | --- | --- | --- | --- | --- | --- | --- |
| NIMCGCN (Li et al., 2020) | | 0.8945 | | 0.8926 | | 0.8131 | | 0.8076 | | 0.822 | | 0.8148 | |
| ERMDA (Dai et al., 2021) | | 0.9171 | | 0.9173 | | 0.8399 | | 0.8412 | | 0.8382 | | 0.8396 | |
| MAGCN (Zhan, Wu & Gan, 2021) | | 0.9245 | | 0.9268 | | 0.8483 | | 0.8533 | | 0.8425 | | 0.8473 | |
| PATMDA (Xie et al., 2023) | | 0.9347 | | 0.9374 | | 0.8582 | | 0.8599 | | 0.8702 | | 0.8498 | |
| MHCLMDA (Peng et al., 2024) | | 0.9489 | | 0.9506 | | 0.8820 | | 0.8692 | | 0.8993 | | 0.8840 | |
| MHGTMDA (Zou et al., 2024) | | 0.9559 | | 0.9551 | | 0.8927 | | **0.8926** | | 0.8925 | | 0.8926 | |
| DCCM-MSIF | | **0.9689** | | **0.9647** | | **0.9047** | | 0.8703 | | **0.9513** | | **0.9089** | |

Dai Q, Wang Z, Liu Z, Duan X, Song J, and Guo M. 2021. Predicting miRNA-disease associations using an ensemble learning framework with resampling method. *Briefings in Bioinformatics* 23 DOI: 10.1093/bib/bbab543.

Li J, Zhang S, Liu T, Ning C, Zhang Z, and Zhou W. 2020. Neural inductive matrix completion with graph convolutional networks for miRNA-disease association prediction. *Bioinformatics* 36:2538-2546 DOI: 10.1093/bioinformatics/btz965.

Peng W, He Z, Dai W, and Lan W. 2024. MHCLMDA: multihypergraph contrastive learning for miRNA–disease association prediction. *Briefings in Bioinformatics* 25:bbad524 DOI: 10.1093/bib/bbad524.

Xie X, Wang Y, He K, and Sheng N. 2023. Predicting miRNA-disease associations based on PPMI and attention network. *BMC Bioinformatics* 24:113 DOI: 10.1186/s12859-023-05152-z.

Zhan Q, Wu G, and Gan C. 2021. MAGCN: A Multi-Adaptive Graph Convolutional Network for Traffic Forecasting. 2021 International Joint Conference on Neural Networks (IJCNN). Shenzhen, China. p 1-8.

Zou H, Ji B, Zhang M, Liu F, Xie X, and Peng S. 2024. MHGTMDA: Molecular heterogeneous graph transformer based on biological entity graph for miRNA-disease associations prediction. *Molecular Therapy Nucleic Acids* 35 DOI: 10.1016/j.omtn.2024.102139.
