# Supplementary material for: Prediction of miRNA-disease associations using a dual-channel contrastive model based on multi-source information fusion
Source: PeerJ journal article supplement (doi:10.7717/peerj-cs.3378), 2025-12-01
Supplement: Supplemental_Table_S5.docx [file Supplemental_Table_S5.docx]

**Table S5.**

The top 30 associated miRNAs for lung cancer, esophageal tumors and breast cancer predicted by DCCM-MSIF based on the HMDDv3.2. The prediction results were verified in dbDEMC database and HMDDv4.0.

| **lung cancer** | | **esophageal tumors** | | **breast cancer** | |
| --- | --- | --- | --- | --- | --- |
| **Top1-30** | **Evidence** | **Top1-30** | **Evidence** | **Top1-30** | **Evidence** |
| hsa-mir-16-1-3p | EXP00374,HMDDv4.0 | hsa-mir-23b-5p | EXP00600,HMDDv4.0 | hsa-mir-885-5p | EXP00521,HMDDv4.0 |
| hsa-mir-126-5p | EXP00374,HMDDv4.0 | hsa-mir-19b-1-5p | EXP00600 | hsa-mir-19a-5p | EXP00521,HMDDv4.0 |
| hsa-mir-17-5p | EXP00374,HMDDv4.0 | hsa-mir-181c-5p | EXP00600,HMDDv4.0 | hsa-mir-325 | EXP00297 |
| hsa-mir-103a-3p | EXP00526,HMDDv4.0 | hsa-mir-92a-3p | EXP00600,HMDDv4.0 | hsa-mir-634 | EXP00521,HMDDv4.0 |
| hsa-mir-30c-1-3p | EXP00526 | hsa-mir-30a-5p | EXP00600 | hsa-mir-510-5p | EXP00521 |
| hsa-mir-675-5p | EXP00526,HMDDv4.0 | hsa-mir-27a-5p | EXP00600,HMDDv4.0 | hsa-mir-34c-5p | EXP00297,HMDDv4.0 |
| hsa-mir-132-5p | EXP00526,HMDDv4.0 | hsa-mir-381-5p | EXP00600 | hsa-mir-548q | EXP00521,HMDDv4.0 |
| hsa-mir-491-5p | EXP00526,HMDDv4.0 | hsa-mir-92b-5p | EXP00600,HMDDv4.0 | hsa-mir-4295 | EXP00521 |
| hsa-mir-200b-5p | EXP00374,HMDDv4.0 | hsa-mir-148b-5p | EXP00600 | hsa-mir-524-5p | EXP00521,HMDDv4.0 |
| hsa-mir-17-5p | EXP00374,HMDDv4.0 | hsa-mir-301a-5p | EXP00600,HMDDv4.0 | hsa-mir-6831-5p | EXP00521 |
| hsa-mir-222-5p | EXP00374,HMDDv4.0 | hsa-mir-34a-5p | NO | hsa-mir-933 | EXP00297,HMDDv4.0 |
| hsa-mir-146b-5p | EXP00526,HMDDv4.0 | hsa-mir-647 | EXP00600,HMDDv4.0 | hsa-mir-205-5p | EXP00029,HMDDv4.0 |
| hsa-mir-29b-3p | EXP00374,HMDDv4.0 | hsa-mir-9-5p | EXP00600,HMDDv4.0 | hsa-mir-4271 | EXP00521 |
| hsa-mir-342-5p | EXP00374,HMDDv4.0 | hsa-mir-574-5p | EXP00600,HMDDv4.0 | hsa-mir-6875-5p | EXP00521 |
| hsa-mir-1290 | EXP00526,HMDDv4.0 | hsa-mir-3171 | EXP00600 | hsa-mir-4656 | EXP00521,HMDDv4.0 |
| hsa-mir-298 | EXP00526,HMDDv4.0 | hsa-mir-204-5p | EXP00600,HMDDv4.0 | hsa-mir-4742-5p | EXP00521 |
| hsa-mir-544b | EXP00526 | hsa-mir-596 | EXP00546 | hsa-mir-568 | EXP00521 |
| hsa-mir-486-5p | EXP00374,HMDDv4.0 | hsa-mir-4469 | EXP00600,HMDDv4.0 | hsa-mir-126-5p | EXP00521,HMDDv4.0 |
| hsa-mir-24-1-5p | EXP00526,HMDDv4.0 | hsa-mir-1265 | NO | hsa-mir-4448 | EXP00521,HMDDv4.0 |
| hsa-mir-378c | EXP00374,HMDDv4.0 | hsa-mir-329-5p | NO | hsa-mir-4726-5p | EXP00530 |
| hsa-mir-378a-5p | EXP00374,HMDDv4.0 | hsa-mir-224-5p | EXP00600,HMDDv4.0 | hsa-mir-326 | EXP00521,HMDDv4.0 |
| hsa-mir-3201 | EXP00573,HMDDv4.0 | hsa-mir-4687-5p | EXP00600 | hsa-mir-6089 | EXP00521 |
| hsa-mir-449b-5p | EXP00374,HMDDv4.0 | hsa-mir-15b-5p | EXP00600,HMDDv4.0 | hsa-mir-7-2-3p | EXP00521,HMDDv4.0 |
| hsa-mir-330-5p | EXP00526 | hsa-mir-26a-2-3p | EXP00600,HMDDv4.0 | hsa-mir-3074-5p | EXP00521,HMDDv4.0 |
| hsa-mir-506-5p | EXP00526,HMDDv4.0 | hsa-mir-892b | EXP00600 | hsa-mir-3161 | EXP00521 |
| hsa-mir-197-5p | EXP00374,HMDDv4.0 | hsa-mir-513b-5p | EXP00600 | hsa-mir-208b-5p | EXP00521 |
| hsa-mir-711 | EXP00526 | hsa-mir-337-5p | EXP00600,HMDD4v.0 | hsa-mir-30a-5p | EXP00521,HMDDv4.0 |
| hsa-mir-630 | EXP00288,HMDDv4.0 | hsa-mir-561-5p | EXP00600 | hsa-mir-19a-5p | EXP00521,HMDDv4.0 |
| hsa-mir-380-5p | EXP00374 | hsa-mir-1244 | EXP00600 | hsa-mir-383-5p | EXP00521,HMDDv4.0 |
| hsa-mir-617 | EXP00526 | hsa-mir-19b-1-5p | EXP00600,HMDDv4.0 | hsa-mir-181d-5p | EXP00521,HMDDv4.0 |
