# Supplementary material for: Prediction of miRNA-disease associations using a dual-channel contrastive model based on multi-source information fusion
Source: PeerJ journal article supplement (doi:10.7717/peerj-cs.3378), 2025-12-01
Supplement: Supplemental_Table_S6.docx [file Supplemental_Table_S6.docx]

**Table S6.**

The top 20 associated miRNAs for lung cancer, esophageal tumors and breast cancer predicted by DCCM-MSIF based on the HMDDv2.0. The prediction results were verified in dbDEMC database and HMDDv4.0.

| **lung cancer** | | **esophageal tumors** | | **breast cancer** | |
| --- | --- | --- | --- | --- | --- |
| **Top1-20** | **Evidence** | **Top1-20** | **Evidence** | **Top1-20** | **Evidence** |
| hsa-mir-569 | EXP00285,HMDDv4.0 | hsa-mir-155 | EXP00031,HMDD4.0 | hsa-mir-155 | EXP00521,HMDDv4.0 |
| hsa-mir-224 | EXP00285,HMDDv4.0 | hsa-mir-205 | EXP00031,HMDDv4.0 | hsa-mir-19b | EXP00521,HMDDv4.0 |
| hsa-mir-429 | EXP00285,HMDDv4.0 | hsa-mir-126 | EXP00031,HMDDv4.0 | hsa-mir-18a | EXP00521,HMDDv4.0 |
| hsa-mir-200a | EXP00285,HMDDv4.0 | hsa-mir-122 | EXP00031,HMDDv4.0 | hsa-mir-19a | EXP00521,HMDDv4.0 |
| hsa-mir-192 | EXP00285,HMDDv4.0 | hsa-mir-184 | EXP00031,HMDDv4.0 | hsa-mir-17 | EXP00521,HMDDv4.0 |
| hsa-mir-141 | EXP00285,HMDDv4.0 | hsa-mir-135a | EXP00031,HMDDv4.0 | hsa-mir-183 | EXP00521,HMDDv4.0 |
| hsa-mir-200b | EXP00285,HMDDv4.0 | hsa-mir-203 | EXP00031,HMDDv4.0 | hsa-mir-20a | EXP00521,HMDDv4.0 |
| hsa-mir-142 | EXP00285,HMDDv4.0 | hsa-mir-146b | EXP00031,HMDDv4.0 | hsa-mir-127 | EXP00521,HMDDv4.0 |
| hsa-mir-31 | EXP00285,HMDDv4.0 | hsa-mir-127 | EXP00031,HMDDv4.0 | hsa-mir-92a | EXP00521,HMDDv4.0 |
| hsa-mir-181a | EXP00285,HMDDv4.0 | hsa-mir-383 | EXP00031,HMDDv4.0 | hsa-mir-200a | EXP00521,HMDDv4.0 |
| hsa-mir-200c | EXP00285,HMDDv4v.0 | hsa-let-7d | EXP00031,HMDDv4.0 | hsa-mir-93 | EXP00521,HMDDv4.0 |
| hsa-mir-30a | EXP00285,HMDDv4.0 | hsa-mir-146a | EXP00031,HMDDv4.0 | hsa-mir-146a | EXP00521,HMDDv4.0 |
| hsa-mir-101 | EXP00285,HMDDv4.0 | hsa-mir-21 | EXP00031,HMDDv4.0 | hsa-mir-200b | EXP00521,HMDDv4.0 |
| hsa-mir-205 | EXP00285,HMDDv4.0 | hsa-mir-494 | EXP00031,HMDDv4.0 | hsa-mir-96 | EXP00521,HMDDv4.0 |
| hsa-mir-19b | EXP00285,HMDDv4.0 | hsa-mir-93 | EXP00031,HMDDv4.0 | hsa-mir-141 | EXP00521,HMDDv4.0 |
| hsa-mir-126 | EXP00285,HMDDv4.0 | hsa-mir-17 | EXP00031,HMDDv4.0 | hsa-mir-429 | EXP00521,HMDDv4.0 |
| hsa-mir-146a | EXP00285,HMDDv4.0 | hsa-mir-485 | EXP00031,HMDDv4.0 | hsa-mir-182 | EXP00521,HMDDv4.0 |
| hsa-mir-17 | EXP00285,HMDDv4.0 | hsa-mir-193a | EXP00031,HMDDv4.0 | hsa-mir-361 | EXP00521,HMDDv4.0 |
| hsa-mir-20a | EXP00285,HMDDv4.0 | hsa-mir-7 | EXP00031,HMDDv4.0 | hsa-mir-297 | EXP00521,HMDDv4.0 |
| hsa-mir-145 | EXP00285,HMDDv4.0 | hsa-mir-28 | EXP00031,HMDDv4.0 | hsa-mir-455 | EXP00521,HMDDv4.0 |
